# Supplementary material for: Insight into the quantum anomalous Hall states in two-dimensional kagome Cr3Se4 and Fe3S4 monolayers
Source: Royal Society of Chemistry journal article supplement (doi:10.1039/d3nr03582d), 2023-01-01
Supplement: d3nr03582d1.pdf [file d3nr03582d1.pdf]

## Supporting Information

### Insight into the Quantum Anomalous Hall States in Two-Dimensional Kagome $\text{Cr}_3\text{Se}_4$ and $\text{Fe}_3\text{S}_4$ Monolayers

Huijie Lian,<sup>1#</sup> Xiaokang Xu,<sup>2#</sup> Ying Han,<sup>2</sup> Jie Li,<sup>2</sup> Wenqi Zhou,<sup>2</sup> Xiaojing Yao,<sup>1\*</sup> Jinlian Lu,<sup>3\*</sup> Xiuyun Zhang<sup>2\*</sup>

<sup>1</sup>College of Physics and Hebei Advanced Thin Films Laboratory, Hebei Normal University, Shijiazhuang 050024, China.

<sup>2</sup>College of Physics Science and Technology, Yangzhou University, Yangzhou 225002, China.

<sup>3</sup>Department of Physics, Yancheng Institute of Technology, Yancheng, Jiangsu 224051, China

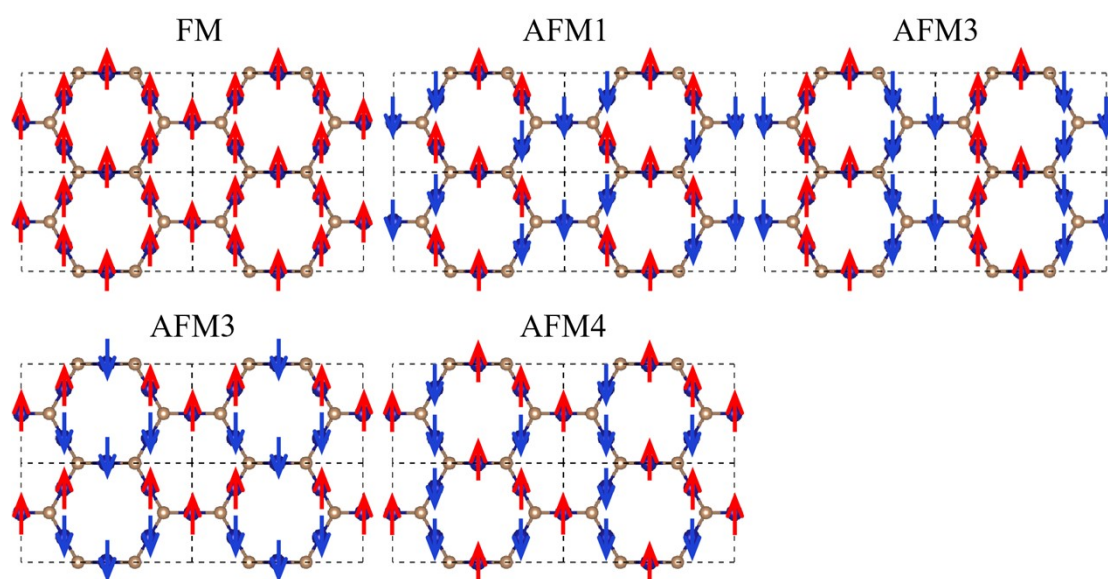

**Figure S1.** The considered magnetic configurations: ferromagnetic (FM) state and four antiferromagnetic (AFM1, AFM2, AFM3 and AFM4) states for  $\text{Cr}_3\text{Se}_4$  and  $\text{Fe}_3\text{S}_4$  monolayers.

**Table S1.** The relative energy (meV) of  $\text{Cr}_3\text{Se}_4$  and  $\text{Fe}_3\text{S}_4$  monolayers with different magnetic states in each formula.

|                          | FM | AFM1 | AFM2 | AFM3 | AFM4 |
|--------------------------|----|------|------|------|------|
| $\text{Cr}_3\text{Se}_4$ | 0  | 46.1 | 27.1 | 44.7 | 37.4 |
| $\text{Fe}_3\text{S}_4$  | 0  | 35.1 | 29.4 | 34.1 | 20.9 |

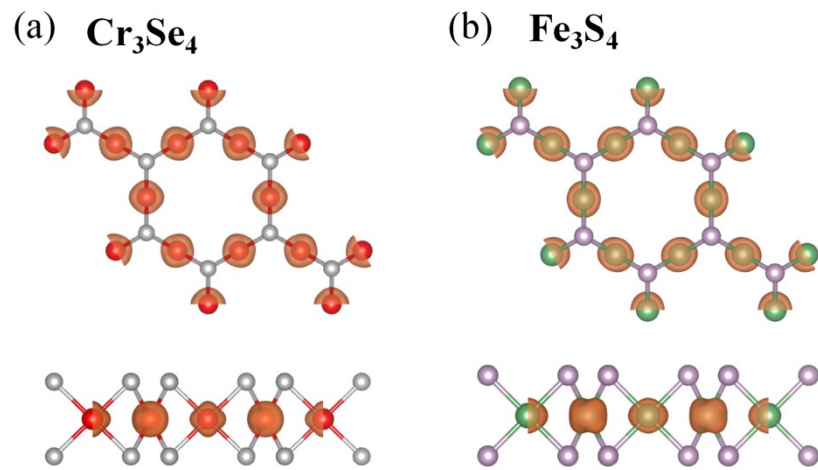

**Figure S2.** Spin densities of FM  $\text{Cr}_3\text{Se}_4$  (a) and  $\text{Fe}_3\text{S}_4$  (b) monolayers.

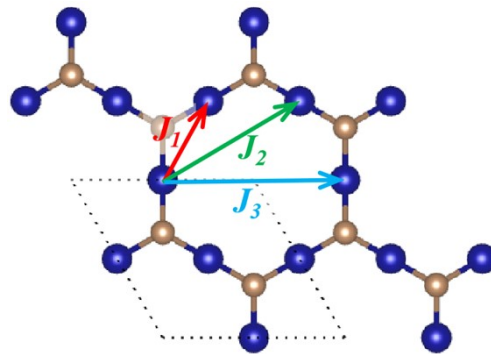

**Figure S3.**  $J_1$ ,  $J_2$  and  $J_3$  are the nearest, second-nearest and third-nearest exchange parameters, respectively.

### Part I:

The Hamiltonian can be written as below based on 2D Heisenberg Hamiltonian model:

$$H = -\sum_{i,j} J_1 M_i M_j - \sum_{p,q} J_2 M_p M_q - \sum_{m,n} J_3 M_m M_n \quad (1),$$

where  $M_i$  is the magnetic moment of the atom in site  $i$ ,  $J_1$ ,  $J_2$  and  $J_3$  denote as the nearest, second-nearest, and third-nearest exchange coupling parameters (as shown in Fig. S3), respectively. The values of  $J_1$ ,  $J_2$  and  $J_3$  can be estimated from the energy differences between FM and AFM states:

$$E_{FM} = E_0 - (12J_1 + 12J_2 + 18J_3)M^2 \quad (2),$$

$$E_{AFM1} = E_0 - (-4J_1 - 4J_2 + 10J_3)M^2 \quad (3),$$

$$E_{AFM2} = E_0 - (-4J_1 + 4J_2 - 6J_3)M^2 \quad (4),$$

$$E_{AFM3} = E_0 - (-4J_1 - 4J_2 + 6J_3)M^2 \quad (5),$$

$$E_{AFM4} = E_0 - (4J_1 - 4J_2 - 6J_3)M^2 \quad (6).$$

The  $J_1/J_2/J_3$  values for  $\text{Cr}_3\text{Se}_4$  monolayer and  $\text{Fe}_3\text{S}_4$  monolayer are 7.90meV/5.88meV/-8.22meV and 15.6meV/1.33meV/-1.31meV, respectively.

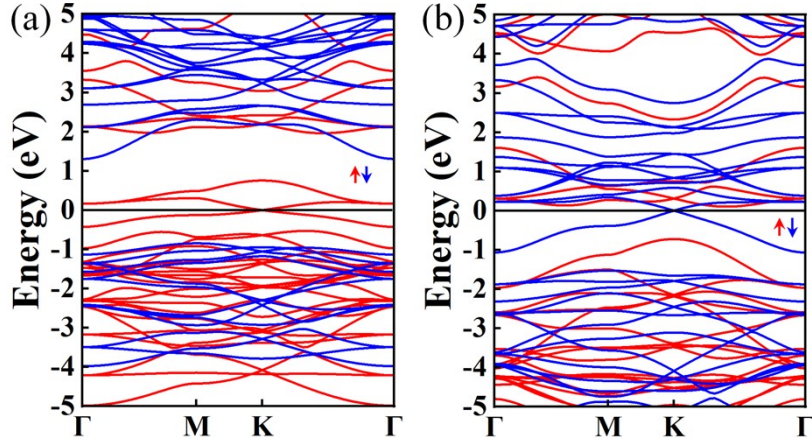

**Figure S4.** The band structures with large energy window [-5eV, 5eV] of  $\text{Cr}_3\text{Se}_4$  (a) and  $\text{Fe}_3\text{S}_4$  (b) monolayers.

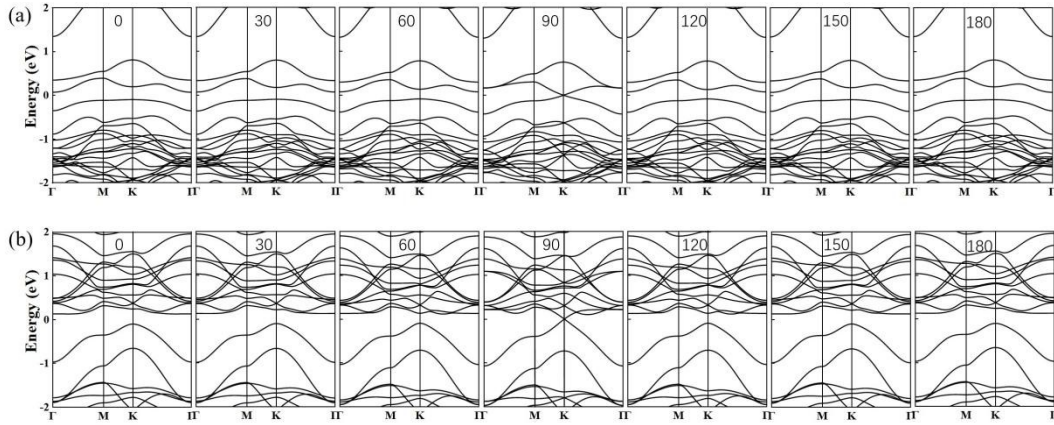

**Figure S5.** Band structures of  $\text{Cr}_3\text{Se}_4$  monolayer (a) and  $\text{Fe}_3\text{S}_4$  monolayer (b) when the *zoy* plane magnetization rotates in the *z*-direction.

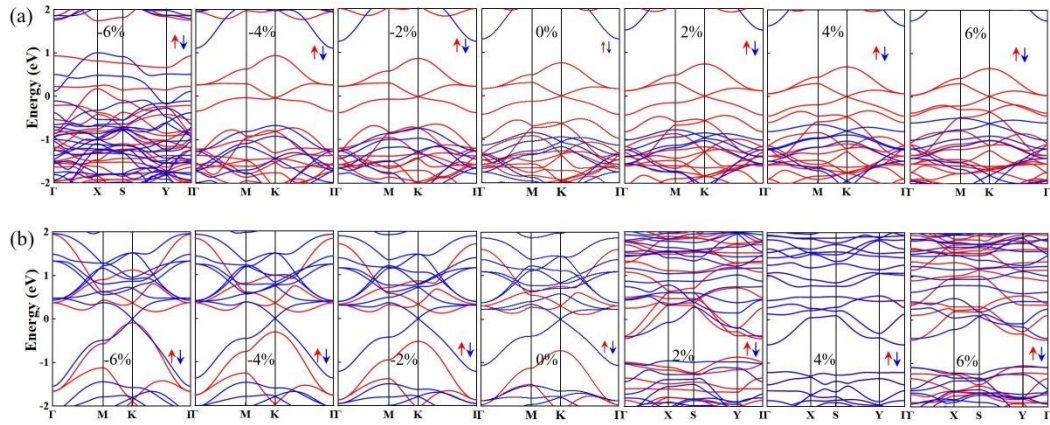

**Figure S6.** Band structures of  $\text{Cr}_3\text{Se}_4$  monolayer (a) and  $\text{Fe}_3\text{S}_4$  monolayer (b) within biaxial tensile/compressive strains of  $\pm 6\%$ .

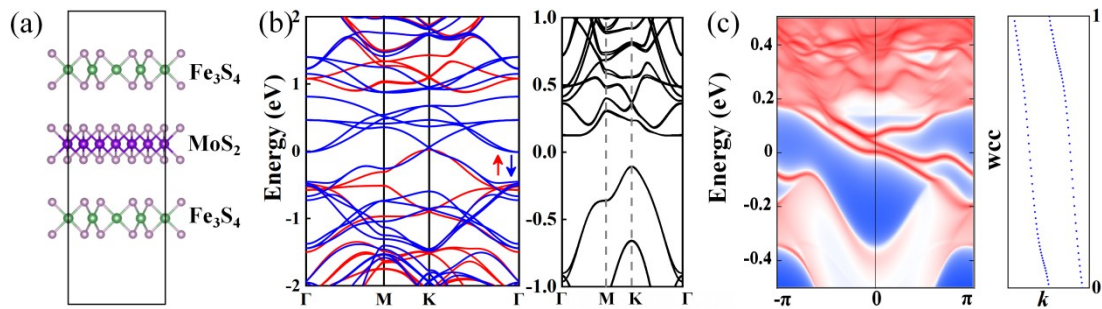

**Figure S7.** (a) Side view of the  $\text{Fe}_3\text{S}_4/\text{MoS}_2/\text{Fe}_3\text{S}_4$  heterostructures. (b) Spin polarized band structure without SOC and with SOC when magnetization is along *z* direction. (c) Edge states, and wannier charge center (WCC) of  $\text{Fe}_3\text{S}_4/\text{MoS}_2/\text{Fe}_3\text{S}_4$  heterostructure.

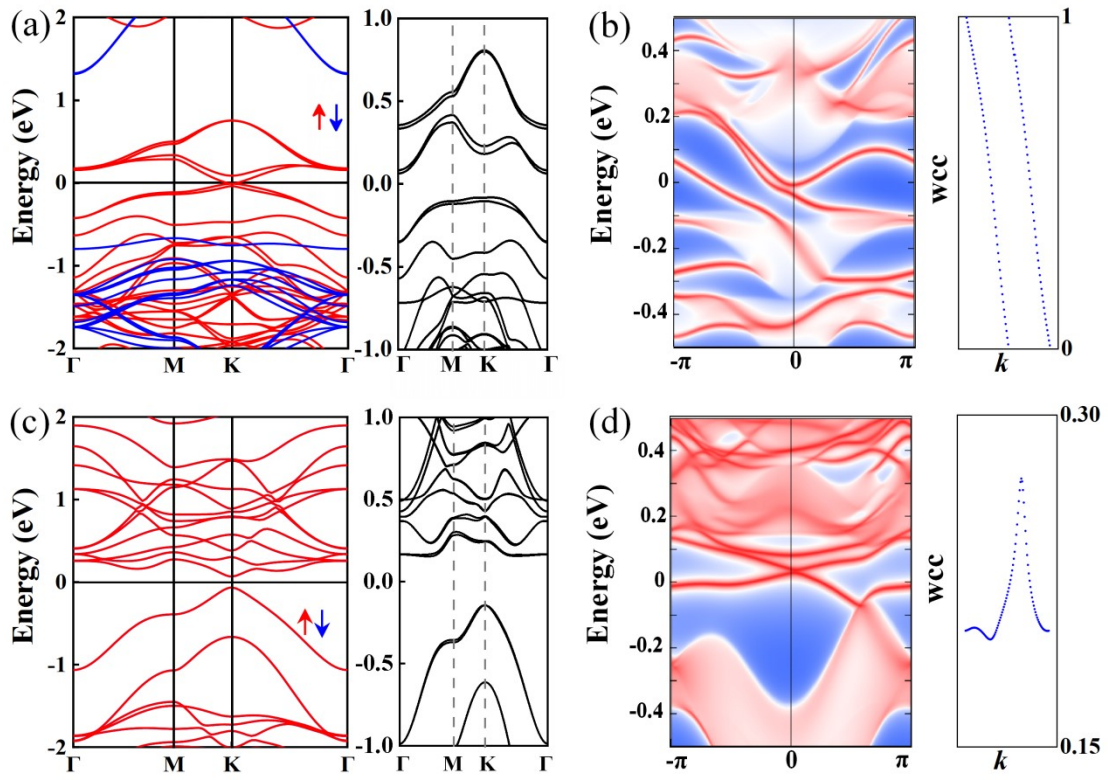

**Figure S8.** Spin polarized band structures, edge states and wannier charge center (WCC) of bilayer  $\text{Cr}_3\text{Se}_4$  in the FM (a, b) and bilayer  $\text{Fe}_3\text{S}_4$  in AFM state (c, d).
